# Supplementary material for: Effects of a Clinical Simulation-Based Training Program for Nursing Students to Address Social Isolation and Loneliness in the Elderly: A Quasi-Experimental Study
Source: MDPI journal article supplement (doi:10.3390/healthcare11182587), 2023-09-19
Supplement: s1 [file s1]

Table S1. Scores obtained in the items from the KAOP questionnaire pre and post training.

| Items                                                                                                             | Pre-training<br>( <i>n</i> = 25) | Post-training<br>( <i>n</i> = 25) | Bootstrap analysis § |               |      | Pre – Post training |          |          |
|-------------------------------------------------------------------------------------------------------------------|----------------------------------|-----------------------------------|----------------------|---------------|------|---------------------|----------|----------|
|                                                                                                                   | <i>M</i> ( <i>SD</i> )           | <i>M</i> ( <i>SD</i> )            | <i>M</i>             | 95% <i>CI</i> |      | <i>t</i>            | <i>p</i> | <i>d</i> |
| 1. It would probably be much better if seniors lived in residential areas with people their own age*              | 3.6 (1.15)                       | 5.00 (1.12)                       | 1.40                 | 0.79          | 2.01 | 4.76                | <0.001   | 0.95     |
| 2. It would probably be better if seniors lived in residential areas with younger people                          | 4.04 (1.14)                      | 4.76 (0.72)                       | 0.72                 | 0.18          | 1.26 | 2.75                | 0.011    | 0.55     |
| 3. There is something different in seniors ; it's hard to know if something bothers them a lot*                   | 4.84 (0.99)                      | 5.36 (0.99)                       | 0.52                 | 0.03          | 1.01 | 2.18                | 0.040    | 0.44     |
| 4. Most seniors are really no different from everyone else; just like younger people, they are easy to understand | 3.92 (1.08)                      | 4.84 (0.90)                       | 0.92                 | 0.40          | 1.44 | 3.66                | 0.001    | 0.73     |
| 5. Most seniors have established ways of being and/or acting that are difficult for them to change*               | 2.84 (1.03)                      | 4.64 (0.76)                       | 1.80                 | 1.23          | 2.37 | 6.50                | <0.001   | 1.30     |
| 6. Most seniors are able to adapt when the situation requires it                                                  | 3.28 (0.54)                      | 4.32 (0.69)                       | 1.04                 | 0.67          | 1.41 | 5.85                | <0.001   | 1.17     |
| 7. Most seniors prefer to retire as soon as their pensions or children can support them.*                         | 3.68 (1.14)                      | 5.40 (0.87)                       | 1.72                 | 1.07          | 2.37 | 5.48                | <0.001   | 1.10     |
| 8. Most older people prefer to continue working as long as they can do it rather than depending on someone else   | 4.40 (0.65)                      | 5.32 (0.99)                       | 0.92                 | 0.37          | 1.47 | 3.48                | 0.002    | 0.70     |
| 9. Most older people tend to have their homes in an unwanted and unattractive state.*                             | 3.80 (0.58)                      | 5.44 (0.87)                       | 1.64                 | 1.15          | 2.13 | 6.91                | <0.001   | 1.38     |
| 10. Most seniors can generally be relied on to maintain a clean and attractive home                               | 3.80 (0.71)                      | 4.76 (0.72)                       | 0.96                 | 0.61          | 1.31 | 5.71                | <0.001   | 1.14     |
| 11. It is silly to think that wisdom comes with age.*                                                             | 3.76 (0.83)                      | 5.08 (0.70)                       | 1.32                 | 0.91          | 1.73 | 6.68                | <0.001   | 1.34     |
| 12. La gente se vuelve más sabia con la edad                                                                      | 4.12 (0.78)                      | 5.08 (0.70)                       | 0.96                 | 0.59          | 1.33 | 5.40                | <0.001   | 1.08     |
| 13. Older people have a lot of power in business and politics*                                                    | 3.76 (0.66)                      | 4.56 (0.71)                       | 0.80                 | 0.44          | 1.16 | 4.62                | <0.001   | 0.92     |
| 14. Older people should have more power in business and politics                                                  | 3.72 (0.98)                      | 5.28 (0.84)                       | 1.56                 | 0.99          | 2.13 | 5.62                | <0.001   | 1.13     |
| 15. Most old people make you feel uncomfortable.*                                                                 | 3.76 (0.78)                      | 5.36 (1.04)                       | 1.60                 | 1.02          | 2.18 | 5.66                | <0.001   | 1.13     |
| 16. Most older people make you feel relaxed when you are around them.                                             | 4.00 (0.41)                      | 5.44 (0.87)                       | 1.44                 | 1.03          | 1.85 | 7.18                | <0.001   | 1.44     |
| 17. Most older people bore others by insisting on wanting to talk about the “old days”*                           | 4.12 (0.67)                      | 5.56 (0.82)                       | 1.44                 | 0.99          | 1.89 | 6.65                | <0.001   | 1.33     |

|                                                                                                                                    |             |             |      |      |      |      |        |      |
|------------------------------------------------------------------------------------------------------------------------------------|-------------|-------------|------|------|------|------|--------|------|
| 18. One of the most interesting and entertaining qualities of most older people is telling their past experiences                  | 4.32 (0.48) | 5.48 (0.82) | 1.16 | 0.72 | 1.60 | 5.43 | <0.001 | 1.09 |
| 19. Most older people spend a lot of time meddling in other people's business and giving advice to those who haven't asked for it* | 4.00 (0.65) | 5.44 (0.87) | 1.44 | 0.99 | 1.89 | 6.65 | <0.001 | 1.33 |
| 20. Most older people tend to give advice only when asked.                                                                         | 3.52 (1.08) | 5.12 (1.13) | 1.60 | 0.97 | 2.23 | 5.24 | <0.001 | 1.05 |
| 21. If older people want other people to like them, their first step should be to get rid of their irritating flaws*               | 3.84 (0.62) | 5.56 (0.82) | 1.72 | 1.27 | 2.17 | 7.82 | <0.001 | 1.56 |
| 22. If you think a little, older people have the same flaws as anyone else                                                         | 3.72 (0.54) | 5.40 (0.87) | 1.68 | 1.29 | 2.07 | 8.89 | <0.001 | 1.78 |
| 23. In order to have a nice neighborhood, it would be better not to have many older people living there.*                          | 4.20 (0.58) | 5.52 (0.82) | 1.32 | 0.82 | 1.82 | 5.43 | <0.001 | 1.09 |
| 24. You can count on a nice neighborhood when there are a considerable number of older people living there                         | 3.76 (0.52) | 5.44 (0.92) | 1.68 | 1.19 | 2.17 | 7.12 | <0.001 | 1.42 |
| 25. There are some exceptions; but in general most older people are very similar*                                                  | 3.84 (0.55) | 5.32 (0.9)  | 1.48 | 1.08 | 1.88 | 7.69 | <0.001 | 1.54 |
| 26. It is evident that most older people are very different from each other                                                        | 3.68 (0.75) | 5.44 (0.92) | 1.76 | 1.26 | 2.26 | 7.33 | <0.001 | 1.47 |
| 27. Most older people should care more about their personal appearance; they are very messy*                                       | 3.76 (0.52) | 5.44 (0.82) | 1.68 | 1.26 | 2.10 | 8.16 | <0.001 | 1.63 |
| 28. Most older people appear quite neat and tidy in their personal appearance.                                                     | 3.68 (0.56) | 5.32 (0.99) | 1.64 | 1.11 | 2.17 | 6.37 | <0.001 | 1.27 |
| 29. Most older people are irritable, moody and unpleasant*                                                                         | 4.04 (0.35) | 5.48 (0.82) | 1.44 | 1.12 | 1.76 | 9.37 | <0.001 | 1.88 |
| 30. Most older people are cheerful, pleasant and in a good mood                                                                    | 3.84 (0.62) | 4.76 (0.93) | 0.92 | 0.48 | 1.36 | 4.27 | <0.001 | 0.85 |
| 31. Most older people constantly complain about the behavior of the younger generations*                                           | 3.16 (0.9)  | 5.28 (0.89) | 2.12 | 1.56 | 2.68 | 7.77 | <0.001 | 1.55 |
| 32. One hardly ever hears older people complain about the behavior of younger generations                                          | 2.84 (0.9)  | 5.00 (1.26) | 2.16 | 1.56 | 2.76 | 7.38 | <0.001 | 1.48 |
| 33. Most older people require more love and security than anyone else*                                                             | 2.28 (1.06) | 4.80 (0.50) | 2.52 | 2.00 | 3.04 | 9.98 | <0.001 | 2.00 |

|                                                                           |             |             |      |      |      |      |        |      |
|---------------------------------------------------------------------------|-------------|-------------|------|------|------|------|--------|------|
| 34. Most older people do not need more love and security than anyone else | 2.36 (0.95) | 4.52 (0.92) | 2.16 | 1.56 | 2.76 | 7.38 | <0.001 | 1.48 |
|---------------------------------------------------------------------------|-------------|-------------|------|------|------|------|--------|------|

§ The Bootstrap results are based on a simulation with 1000 participants

\* Negative items

*M* = man; *SD* = standard deviation; *CI*= Confidence interval; *d* = Cohen's effect size
